# Supplementary material for: Effect of Perioperative Palliative Care on Health-Related Quality of Life Among Patients Undergoing Surgery for Cancer: A Randomized Clinical Trial
Source: PubMed Central journal article supplement (PMC10233417; doi:10.1001/jamanetworkopen.2023.14660), 2023-05-31
Supplement: jamanetwopen-e2314660-s002.pdf [file jamanetwopen-e2314660-s002.pdf]

## Supplementary Online Content

Aslakson RA, Rickerson E, Fahy B, et al. Effect of perioperative palliative care on health-related quality of life among patients undergoing surgery for cancer: a randomized clinical trial. *JAMA Netw Open*. 2023;6(5):e2314660.  
doi:10.1001/jamanetworkopen.2023.14660

### **eAppendix.** Patient Questionnaire

This supplementary material has been provided by the authors to give readers additional information about their work.

**eAppendix. Patient Questionnaire**  
**Clinician PC Visit Summary**

**Date of visit (MM-DD-YYYY):** \_\_\_\_\_

**Name of palliative care provider (your name):** \_\_\_\_\_

**What type of visit was this:**

- In-person visit  
In-person visit – please specify location: \_\_\_\_\_
- Telephone visit  
Phone call – who participated in the phone call?
  - Patient
  - Family member/Friend
  - OtherIf other person was involved in phone call – please specify: \_\_\_\_\_
- Other  
Other type of visit – please specify: \_\_\_\_\_

**Please indicate which occurred during your visit (check all that apply):**

- Relationship/Rapport building
- Illness understanding/Education
- Cancer treatment decisions/Decision making
- Coping with serious illness
- Symptom management
- Advance care planning
- Other  
Other topic that occurred in your visit (please specify) \_\_\_\_\_

**What was the primary (1<sup>st</sup>) focus of your visit?**

- Relationship/Rapport building
- Illness understanding/Education
- Cancer treatment decisions/Decision making
- Coping with serious illness
- Symptom management

- Advance care planning
  - Other
- Other (please specify): \_\_\_\_\_

**What was the secondary (2<sup>nd</sup>) focus of your visit?**

- Relationship/Rapport building
  - Illness understanding/Education
  - Cancer treatment decisions/Decision making
  - Coping with serious illness
  - Symptom management
  - Advance care planning
  - N/A
  - Other
- Other (please specify): \_\_\_\_\_

**What was the tertiary (3<sup>rd</sup>) focus of your visit?**

- Relationship/Rapport building
  - Illness understanding/Education
  - Cancer treatment decisions/Decision making
  - Coping with serious illness
  - Symptom management
  - Advance care planning
  - N/A
  - Other
- Other (please specify): \_\_\_\_\_

**Illness understanding/Education – please specify which occurred (check all that apply):**

- Disease understanding
  - Prognosis
  - Review of test or surgery findings
  - Other
- Other (please specify): \_\_\_\_\_

**Coping with serious illness – please specify which were discussed (check all that apply):**

- Behavioral (ex. exercise, sleep, hobbies)
- Spiritual

- Maintaining/redirecting hope
  - Life review
  - Counseling by palliative care provider
  - Referral for patient to see outside provider (i.e. psychologist, psychiatrist, therapist, etc.)
  - Referral for family member/caregiver to outside provider (i.e. psychologist, psychiatrist, therapist, etc.)
  - Other
- Other (please specify): \_\_\_\_\_

**Who was outside referral made to for “coping with serious illness?”**

- N/A – not discussed/no intervention needed
  - Psychiatry referral
  - Psychology referral
  - Social work referral
  - Pastoral counseling referral
  - Other referral
- Other referral (please specify): \_\_\_\_\_

**Advance care planning – please specify what occurred (check all that apply):**

- N/A – not discussed/no intervention needed
  - Health care proxy
  - Goals of Care sheet
  - Death planning or discussion
  - Financial planning/discussion
  - Other
- Other (please specify): \_\_\_\_\_

**Which symptoms were addressed? (Check all that apply)**

- Pain
  - Dyspnea
  - Depression
  - Anxiety
  - Insomnia
  - Anorexia
  - Fatigue
  - Nausea/Vomiting/Bloating
  - Other
- Other (please specify): \_\_\_\_\_

**Pain – How was this symptom addressed? (Check all that apply)**

- N/A – not discussed/no intervention needed
  - Counseling/Patient education
  - Referral
  - Medications
  - Other
- Other (please specify): \_\_\_\_\_

**Pain referral – please specify (check all that apply):**

- N/A – not discussed/no intervention needed
  - Interventional pain clinic
  - Physical therapy
  - Integrative therapies (acupuncture, massage, etc.)
  - Psychotherapy (ex. CBT)
  - Other
- Other (please specify): \_\_\_\_\_

**Dyspnea – How was this symptom addressed? (Check all that apply)**

- N/A – not discussed/no intervention needed
  - Counseling/Patient education
  - Referral
- Referral (please specify): \_\_\_\_\_
- Medications
  - Other
- Other (please specify): \_\_\_\_\_

**Depression – How was this symptom addressed? (Check all that apply)**

- N/A – not discussed/no intervention needed
  - Counseling/Patient education
  - Referral
  - Medications
  - Other
- Other (please specify): \_\_\_\_\_

**Depression referral – made to who? (Check all that apply)**

- N/A – not discussed/no intervention needed
- Psychiatry/Psychiatric APN or MD
- Social Work
- Psychology
- Chaplaincy
- Other  
Other (please specify): \_\_\_\_\_

**Anxiety – How was this symptom addressed? (Check all that apply)**

- N/A – not discussed/no intervention needed
- Counseling/Patient education
- Referral
- Medications
- Other  
Other (please specify): \_\_\_\_\_

**Anxiety referral – made to who? (Check all that apply)**

- N/A – not discussed/no intervention needed
- Psychiatry/Psychiatric APN or MD
- Social Work
- Psychology
- Chaplaincy
- Other  
Other (please specify): \_\_\_\_\_

**Insomnia – How was this symptom addressed? (Check all that apply)**

- N/A – not discussed/no intervention needed
- Counseling/Patient education
- Referral  
Referral (please specify): \_\_\_\_\_
- Medications
- Other  
Other (please specify): \_\_\_\_\_

**Fatigue – How was this symptom addressed? (Check all that apply)**

- N/A – not discussed/no intervention needed
- Counseling/Patient education

- Referral  
Referral (please specify): \_\_\_\_\_
- Medications
- Other  
Other (please specify): \_\_\_\_\_

**Nausea/Vomiting/Bloating – How was this symptom addressed? (Check all that apply)**

- N/A – not discussed/no intervention needed
- Counseling/Patient education
- Referral  
Referral (please specify): \_\_\_\_\_
- Medications
- Other  
Other (please specify): \_\_\_\_\_

**Anorexia – How was this symptom addressed? (Check all that apply)**

- N/A – not discussed/no intervention needed
- Counseling/Patient education
- Referral  
Referral (please specific): \_\_\_\_\_
- Medications
- Other  
Other (please specify): \_\_\_\_\_

**Was an additional symptom addressed?**

- Yes  
Please identify other symptom: \_\_\_\_\_
- No

**How was this symptom addressed? (Check all that apply)**

- Counseling/Patient education
- Referral  
Referral (please specify): \_\_\_\_\_
- Medications
- Other  
Other (please specify): \_\_\_\_\_

**Total Time of visit (in minutes):** \_\_\_\_\_

**Did you communicate with the patient's surgeon regarding this visit?**

- Yes
- No

**How did you communicate with the surgeon?**

- Personalized email
- Phone
- In person

**Compared with the last visit, would you rate the patient's current clinical status as:**

- Improving
- Stable
- Declining
- N/A (this is the first visit with the patient)

**How would you assess the patient's ability to tolerate discussions of their expected prognosis?**

- Unable to tolerate
- Able to tolerate some discussion
- Able to tolerate extensive discussion
- Chose not to assess this today
- N/A – Unable to assess
