# Supplementary material for: Effect of Perioperative Palliative Care on Health-Related Quality of Life Among Patients Undergoing Surgery for Cancer: A Randomized Clinical Trial
Source: PubMed Central journal article supplement (PMC10233417; doi:10.1001/jamanetworkopen.2023.14660), 2023-05-31
Supplement: jamanetwopen-e2314660-s003.pdf [file jamanetwopen-e2314660-s003.pdf]

## Data Sharing Statement

Aslakson. Effect of Perioperative Palliative Care on Health-Related Quality of Life Among Patients Undergoing Surgery for Cancer. *JAMA Netw Open*. Published May 31, 2023. doi:10.1001/jamanetworkopen.2023.14660

### Data

**Data available:** Yes

**Data types:** Deidentified participant data

**How to access data:** Study data will be stored for potential sharing within the Palliative Care Research Cooperative (PCRC); requests for data sharing can be made directly to the PCRC at their website <https://palliativecareresearch.org>.

**When available:** beginning date: 12-31-2023

### Supporting Documents

**Document types:** None

### Additional Information

**Who can access the data:** Researchers may submit requests to the Palliative Care Research Cooperative for use of the data for secondary data analyses

**Types of analyses:** For secondary data analysis with a specified purpose.

**Mechanisms of data availability:** The mechanism is to submit a proposal to the Palliative Care Research Cooperative which they review and then use to grant access.

**Any additional restrictions:** No further restrictions.
